# Supplementary material
Source: MDPI journal article supplement (https://www.mdpi.com/2076-3417/7/9/944)
Supplement: s1 [file s1]

# Supplementary Materials: Characterization of Surface Ozone Behaviour at Different Regimes

Nadia F. Afonso and José Pires

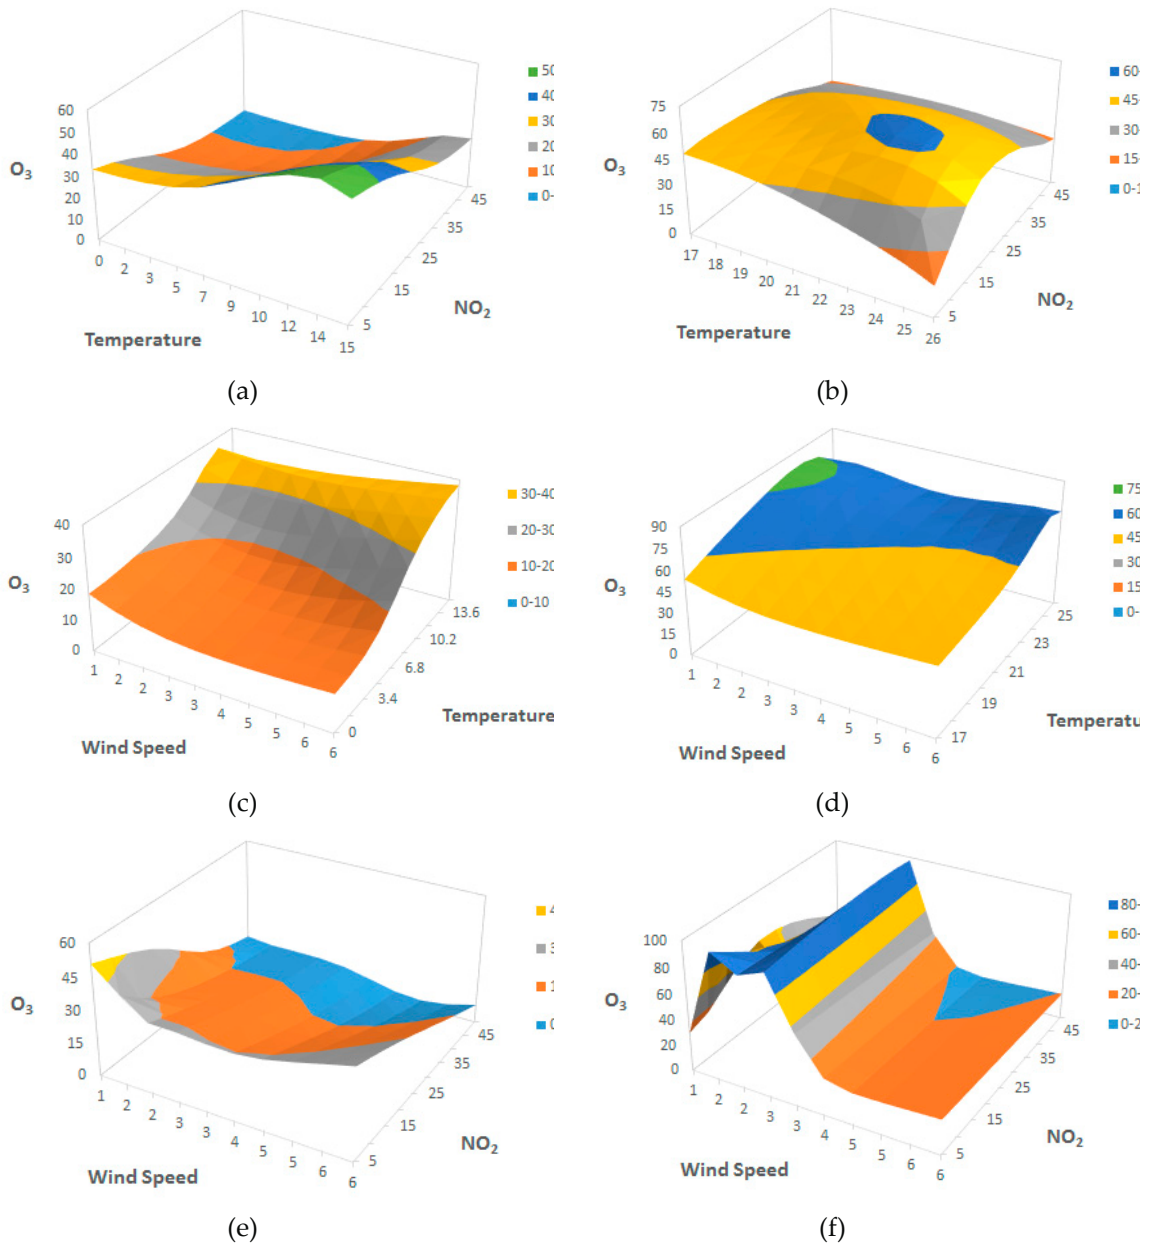

**Figure S1.** The combined effect of NO<sub>2</sub> concentrations, temperature, and wind speed on O<sub>3</sub> concentrations based on the model determined in Simulation II where  $T \leq 17.5$  °C (a,c,e) and where  $T > 17.5$  °C (b,d,f).

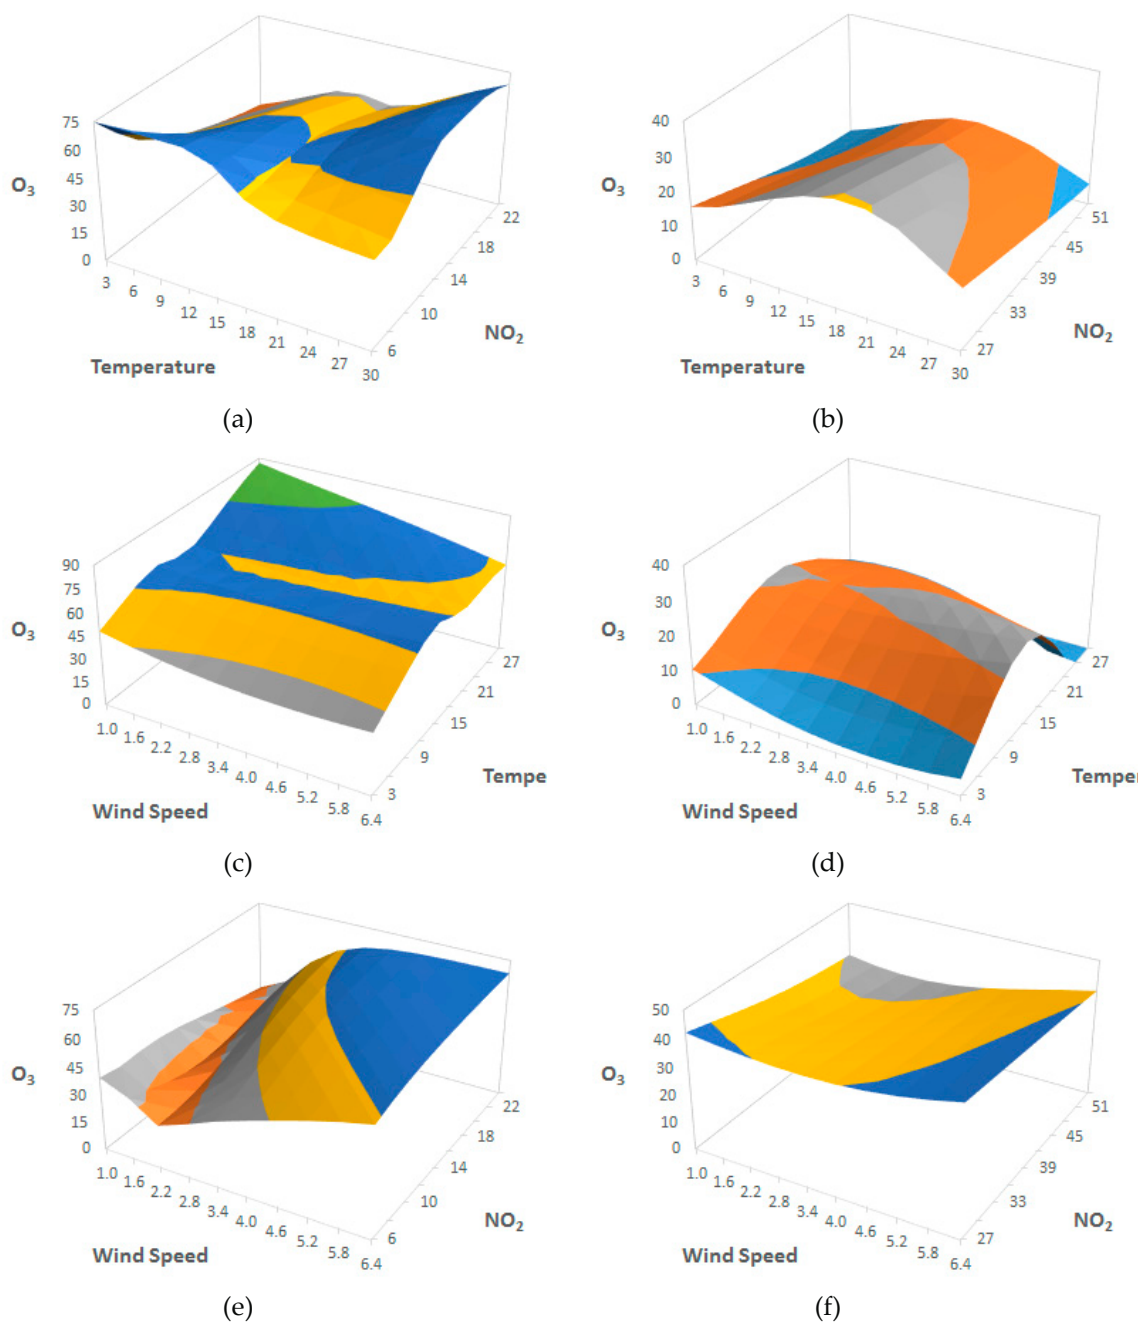

**Figure S2.** The combined effect of NO<sub>2</sub> concentrations, temperature, and wind speed on O<sub>3</sub> concentrations based on the model determined in Simulation III where NO<sub>2</sub> ≤ 26.6 μg·m<sup>-3</sup> (a,c,e) and where NO<sub>2</sub> > 26.6 μg·m<sup>-3</sup> (b,d,f).
